# Supplementary material
Source: publisher figshare collection journal article supplement (https://tandf.figshare.com/ndownloader/files/24915090)
Supplement: Supplementary file 1 [file 24915090]

**Supplemental Table 1. Sample Characteristics Stratified by Sex**

| Characteristics | | Total | Female | Male | p-value |
| --- | --- | --- | --- | --- | --- |
| N=1107 | N=766 | N=341 |  |
| Age |  | 60.4 (9.7) | 60.5 (9.8) | 60.2 (9.5) | 0.650 |
| Education |  |  |  |  |  |
| < High school |  | 136 (12%) | 79 (10%) | 57 (17%) | 0.012 |
| High school |  | 174 (16%) | 123 (16%) | 51 (15%) |
| > High school |  | 796 (72%) | 563 (74%) | 233 (68%) |
| Income |  |  |  |  |  |
| Poor |  | 92 (10%) | 69 (11%) | 23 (8%) | 0.002 |
| Lower-middle |  | 199 (21%) | 150 (23%) | 49 (17%) |
| Upper-middle |  | 298 (31%) | 213 (32%) | 85 (29%) |
| Affluent |  | 361 (38%) | 224 (34%) | 137 (47%) |
| Alcohol use |  | 539 (49%) | 334 (44%) | 205 (60%) | <0.001 |
| Smoker |  | 112 (10%) | 65 (8%) | 47 (14%) | 0.007 |
| BP medication |  | 680 (61%) | 490 (64%) | 190 (56%) | 0.009 |
| Systolic BP |  | 125.1 (16.2) | 124.4 (16.5) | 126.6 (15.2) | 0.040 |
| Diabetes |  | 269 (24%) | 192 (25%) | 77 (23%) | 0.374 |
| Total cholesterol |  | 197.3 (40.7) | 199.6 (40.8) | 192.2 (39.9) | 0.005 |
| HDL |  | 54.3 (15.2) | 57.3 (15.5) | 47.8 (12.2) | <0.001 |
| Statin medication |  | 304 (27%) | 214 (28%) | 90 (26%) | 0.595 |
| Stroke risk score |  | 0.1 (0.1) | 0.1 (0.1) | 0.2 (0.1) | <0.001 |
| Stroke risk category |  |  |  |  |  |
| Low |  | 315 (28%) | 278 (36%) | 37 (11%) | <0.001 |
| Mid |  | 134 (12%) | 95 (12%) | 39 (11%) |
| High |  | 658 (59%) | 393 (51%) | 265 (78%) |
| DPOAE amplitude  SNR-right Ear | 1000 Hz | 8.0 (6.0) | 8.3 (5.8) | 7.3 (6.5) | 0.015 |
| 1500 Hz | 8.7 (6.2) | 9.1 (5.8) | 7.7 (6.9) | <0.001 |
| 2000 Hz | 8.4 (7.8) | 9.1 (7.9) | 6.7 (7.3) | <0.001 |
| 3000 Hz | 7.1 (6.5) | 8.0 (6.1) | 5.2 (6.9) | <0.001 |
| 4000 Hz | 8.4 (6.4) | 9.0 (6.3) | 7.0 (6.6) | <0.001 |
| 6000 Hz | 7.2 (7.6) | 7.6 (7.6) | 6.2 (7.5) | 0.007 |
| 8000 Hz | 5.1 (6.7) | 5.4 (6.7) | 4.2 (6.5) | 0.007 |
| DPOAE amplitude  SNR-left ear | 1000 Hz | 8.3 (6.4) | 8.6 (6.2) | 7.5 (6.6) | 0.008 |
| 1500 Hz | 8.7 (6.4) | 9.3 (5.6) | 7.4 (7.7) | <0.001 |
| 2000 Hz | 8.5 (6.6) | 9.2 (6.2) | 6.9 (7.1) | <0.001 |
| 3000 Hz | 7.0 (6.5) | 7.8 (5.9) | 5.0 (7.2) | <0.001 |
| 4000 Hz | 8.4 (6.5) | 9.2 (6.1) | 6.6 (6.9) | <0.001 |
| 6000 Hz | 7.2 (7.4) | 7.7 (7.2) | 6.0 (7.7) | 0.001 |
| 8000 Hz | 5.3 (6.6) | 5.5 (6.7) | 4.9 (6.5) | 0.183 |
| PTA4 |  |  |  |  |  |
|  | Right Ear | 19.7 (10.7) | 18.7 (9.6) | 21.9 (12.5) | <0.001 |
|  | Left Ear | 19.5 (10.8) | 18.4 (9.9) | 21.9 (12.3) | <0.001 |
|  | Average | 19.6 (10.1) | 18.5 (9.1) | 21.9 (11.8) | <0.001 |
|  | Worse Ear | 21.5 (11.7) | 20.3 (10.6) | 24.2 (13.4) | <0.001 |
|  | Better Ear | 17.6 (9.3) | 16.7 (8.4) | 19.6 (10.8) | <0.001 |

BP = Blood Pressure

HDL = High density Lipoprotein

DPOAE = Distortion Product Otoacoustic Emission

SNR = Signal to Noise Ratio

PTA4: pure-tone threshold average of 500, 1000, 2000, and 4000 Hz

Supplemental Table 2. Stroke Risk and DPOAE Amplitude Stratified by Age in Normal Hearing (All Freq. ≤ 25 dBHL): Female

| DPOAE Amp |  | age 1 | | age 2 | | age 3 | | age 4 | |
| --- | --- | --- | --- | --- | --- | --- | --- | --- | --- |
| SNR |  | Model 1 | Model 2 | Model 1 | Model 2 | Model 1 | Model 2 | Model 1 | Model 2 |
| Right ear | 1000 Hz | 0.861 p=0.446 | 1.025 p=0.921 | 0.970 p=0.654 | 0.999 p=0.989 | 0.998 p=0.971 | 0.993 p=0.908 | 1.068 p=0.212 | 1.049 p=0.473 |
| (0.584,1.269) | (0.632,1.662) | (0.849,1.108) | (0.861,1.159) | (0.882,1.129) | (0.875,1.127) | (0.961,1.186) | (0.915,1.203) |
| 1500 Hz | 0.922 p=0.712 | 1.172 p=0.566 | 0.958 p=0.529 | 0.944 p=0.426 | 0.962 p=0.629 | 0.961 p=0.624 | 1.037 p=0.492 | 1.032 p=0.638 |
| (0.598,1.423) | (0.679,2.023) | (0.836,1.097) | (0.817,1.090) | (0.819,1.130) | (0.816,1.131) | (0.932,1.155) | (0.900,1.183) |
| 2000 Hz | 0.809 p=0.336 | 0.877 p=0.627 | 0.927 p=0.234 | 0.931 p=0.344 | 0.963 p=0.588 | 0.979 p=0.786 | **1.210 p=0.026** | 1.138 p=0.214 |
| (0.525,1.248) | (0.515,1.495) | (0.817,1.051) | (0.802,1.081) | (0.837,1.107) | (0.837,1.145) | **(1.025,1.428)** | (0.922,1.405) |
| 3000 Hz | 0.973 p=0.892 | 0.942 p=0.817 | 0.916 p=0.249 | 0.881 p=0.175 | 0.924 p=0.186 | 0.923 p=0.233 | 1.105 p=0.217 | 1.071 p=0.454 |
| (0.651,1.455) | (0.564,1.571) | (0.787,1.065) | (0.732,1.059) | (0.822,1.040) | (0.808,1.055) | (0.940,1.300) | (0.889,1.289) |
| 4000 Hz | 0.904 p=0.650 | 1.011 p=0.966 | 0.905 p=0.187 | 0.926 p=0.363 | **0.809 p=0.009** | **0.776 p=0.006** | 1.091 p=0.415 | 0.991 p=0.938 |
| (0.583,1.402) | (0.603,1.697) | (0.781,1.050) | (0.784,1.094) | **(0.691,0.945)** | **(0.649,0.927)** | (0.880,1.351) | (0.772,1.271) |
| 6000 Hz | 0.914 p=0.661 | 1.017 p=0.945 | 0.923 p=0.303 | 0.975 p=0.794 | 1.038 p=0.602 | 1.050 p=0.498 | 1.139 p=0.311 | 1.119 p=0.387 |
| (0.609,1.371) | (0.619,1.673) | (0.791,1.077) | (0.805,1.181) | (0.901,1.196) | (0.909,1.214) | (0.880,1.476) | (0.859,1.458) |
| 8000 Hz | 1.011 p=0.967 | 0.799 p=0.495 | 0.925 p=0.396 | 0.931 p=0.530 | 0.895 p=0.189 | 0.966 p=0.668 | 1.038 p=0.678 | 0.991 p=0.939 |
| (0.604,1.690) | (0.417,1.531) | (0.772,1.109) | (0.741,1.168) | (0.757,1.058) | (0.823,1.134) | (0.866,1.243) | (0.780,1.259) |
| Left ear | 1000 Hz | 0.909 p=0.675 | 0.827 p=0.440 | 0.935 p=0.292 | 0.950 p=0.440 | 0.896 p=0.094 | 0.925 p=0.262 | 1.144 p=0.172 | 1.165 p=0.250 |
| (0.580,1.425) | (0.508,1.345) | (0.825,1.060) | (0.833,1.084) | (0.788,1.019) | (0.807,1.062) | (0.940,1.392) | (0.890,1.525) |
| 1500 Hz | 0.734 p=0.095 | 0.720 p=0.148 | 0.931 p=0.354 | 0.896 p=0.147 | 0.984 p=0.798 | 0.992 p=0.913 | 1.027 p=0.696 | 0.949 p=0.522 |
| (0.510,1.056) | (0.460,1.126) | (0.800,1.084) | (0.772,1.040) | (0.870,1.113) | (0.864,1.140) | (0.894,1.181) | (0.803,1.122) |
| 2000 Hz | 0.799 p=0.277 | 0.709 p=0.173 | 0.898 p=0.159 | 0.890 p=0.217 | 0.894 p=0.093 | 0.908 p=0.172 | 1.146 p=0.064 | 1.126 p=0.196 |
| (0.531,1.200) | (0.431,1.166) | (0.772,1.044) | (0.738,1.072) | (0.784,1.019) | (0.789,1.044) | (0.991,1.323) | (0.936,1.355) |
| 3000 Hz | 0.965 p=0.852 | 0.988 p=0.960 | **0.821 p=0.007** | **0.795 p=0.005** | 0.998 p=0.956 | 0.992 p=0.879 | 1.014 p=0.892 | 0.988 p=0.927 |
| (0.659,1.412) | (0.629,1.554) | **(0.712,0.948)** | **(0.680,0.931)** | (0.913,1.090) | (0.896,1.099) | (0.826,1.245) | (0.756,1.292) |
| 4000 Hz | 0.848 p=0.480 | 0.946 p=0.834 | 1.010 p=0.894 | 1.031 p=0.751 | 1.009 p=0.873 | 0.990 p=0.873 | 1.058 p=0.707 | 1.053 p=0.736 |
| (0.536,1.342) | (0.564,1.589) | (0.868,1.176) | (0.854,1.243) | (0.899,1.133) | (0.869,1.127) | (0.782,1.431) | (0.768,1.443) |
| 6000 Hz | 1.448 p=0.108 | 1.720 p=0.057 | 0.962 p=0.655 | 1.032 p=0.759 | 0.929 p=0.231 | 0.931 p=0.307 | **1.210 p=0.034** | 1.225 p=0.061 |
| (0.922,2.274) | (0.983,3.012) | (0.812,1.141) | (0.840,1.269) | (0.823,1.049) | (0.809,1.070) | **(1.015,1.443)** | (0.990,1.517) |
| 8000 Hz | 1.409 p=0.269 | 1.569 p=0.246 | 0.929 p=0.455 | 0.993 p=0.948 | 0.959 p=0.651 | 1.028 p=0.788 | 0.897 p=0.299 | 0.904 p=0.452 |
| (0.765,2.597) | (0.729,3.374) | (0.765,1.129) | (0.796,1.238) | (0.797,1.153) | (0.840,1.258) | (0.727,1.107) | (0.686,1.191) |

DPOAE: Distortion Product Otoacoustic Emissions

Hz: Hertz

Model 1: Unadjusted

Model 2: Adjusted for education and income

Age Quartiles (Age 0 = 40.21-52.64; Age 1 = 52.69-60.07; Age 2 = 60.08-68.52; Age 3 = 68.54-78.97)

Supplemental Table 3. Stroke Risk and DPOAE Amplitude Stratified by Age in Normal Hearing (All Freq. ≤ 25 dBHL):Male

| DPOAE Amp |  | age 1 | | age 2 | | age 3 | | age 4 | |
| --- | --- | --- | --- | --- | --- | --- | --- | --- | --- |
| SNR |  | Model 1 | Model 2 | Model 1 | Model 2 | Model 1 | Model 2 | Model 1 | Model 2 |
| Right ear | 1000 Hz | **0.548 p=0.006** | **0.539 p=0.007** | 0.931 p=0.547 | 0.849 p=0.215 | 0.928 p=0.557 | 0.971 p=0.815 | 1.323 p=0.323 | 1.047 p=0.511 |
| **(0.360,0.835)** | **(0.347,0.839)** | (0.732,1.183) | (0.650,1.107) | (0.710,1.212) | (0.741,1.273) | (0.717,2.443) | (0.861,1.273) |
| 1500 Hz | 0.655 p=0.137 | 0.649 p=0.151 | **0.740 p=0.040** | 0.737 p=0.068 | 0.825 p=0.192 | 0.842 p=0.326 | 1.114 p=0.331 | 1.264 p=0.203 |
| (0.373,1.150) | (0.357,1.178) | **(0.556,0.985)** | (0.530,1.025) | (0.610,1.114) | (0.583,1.217) | (0.876,1.418) | (0.799,2.001) |
| 2000 Hz | 1.011 p=0.962 | 0.940 p=0.800 | 0.816 p=0.098 | 0.779 p=0.077 | 0.887 p=0.286 | 0.911 p=0.458 | 1.126 p=0.325 | 1.403 p=0.173 |
| (0.644,1.586) | (0.575,1.536) | (0.640,1.040) | (0.590,1.029) | (0.705,1.117) | (0.699,1.187) | (0.864,1.467) | (0.696,2.829) |
| 3000 Hz | 1.168 p=0.476 | 1.127 p=0.625 | 0.873 p=0.256 | 0.881 p=0.372 | 1.119 p=0.484 | 1.166 p=0.432 | 1.133 p=0.228 | 1.503 p=0.021 |
| (0.757,1.801) | (0.691,1.837) | (0.688,1.108) | (0.661,1.174) | (0.802,1.561) | (0.773,1.759) | (0.909,1.412) | (1.122,2.014) |
| 4000 Hz | 0.687 p=0.146 | 0.618 p=0.090 | 0.798 p=0.032 | 0.815 p=0.116 | 1.080 p=0.243 | 1.095 p=0.251 | 0.897 p=0.434 | 0.898 p=0.781 |
| (0.413,1.144) | (0.354,1.082) | (0.650,0.980) | (0.628,1.056) | (0.944,1.237) | (0.930,1.289) | (0.662,1.216) | (0.292,2.766) |
| 6000 Hz | 0.512 p=0.082 | **0.430 p=0.045** | 0.989 p=0.942 | 0.956 p=0.800 | 0.938 p=0.558 | 0.944 p=0.642 | 1.111 p=0.390 | 0.836 p=0.285 |
| (0.240,1.093) | **(0.189,0.980)** | (0.733,1.336) | (0.665,1.375) | (0.747,1.178) | (0.726,1.228) | (0.850,1.452) | (0.539,1.296) |
| 8000 Hz | 0.947 p=0.859 | 0.851 p=0.631 | 0.921 p=0.433 | 0.932 p=0.570 | 0.962 p=0.855 | 0.995 p=0.985 | 1.247 p=0.234 | 1.108 p=0.554 |
| (0.511,1.753) | (0.433,1.671) | (0.745,1.137) | (0.722,1.202) | (0.618,1.499) | (0.571,1.735) | (0.840,1.851) | (0.677,1.814) |
| Left ear | 1000 Hz | 1.185 p=0.495 | 1.174 p=0.551 | 0.965 p=0.802 | 1.004 p=0.978 | 0.940 p=0.593 | 0.936 p=0.638 | 0.882 p=0.093 | 1.097 p=0.343 |
| (0.721,1.947) | (0.684,2.017) | (0.728,1.280) | (0.753,1.338) | (0.736,1.200) | (0.690,1.270) | (0.758,1.026) | (0.844,1.424) |
| 1500 Hz | 0.986 p=0.957 | 0.955 p=0.874 | **0.775 p=0.027** | **0.696 p=0.006** | 0.926 p=0.530 | 0.909 p=0.536 | 0.922 p=0.567 | 1.108 p=0.779 |
| (0.583,1.666) | (0.535,1.706) | **(0.620,0.969)** | **(0.543,0.891)** | (0.716,1.196) | (0.654,1.263) | (0.673,1.263) | (0.383,3.206) |
| 2000 Hz | 0.884 p=0.579 | 0.845 p=0.504 | 0.842 p=0.166 | 0.859 p=0.321 | 1.050 p=0.679 | 1.086 p=0.566 | 0.860 p=0.324 | 1.095 p=0.767 |
| (0.567,1.378) | (0.510,1.400) | (0.659,1.077) | (0.631,1.169) | (0.822,1.341) | (0.798,1.479) | (0.617,1.198) | (0.450,2.666) |
| 3000 Hz | 0.873 p=0.535 | 0.784 p=0.314 | 0.958 p=0.797 | 1.076 p=0.702 | 1.050 p=0.624 | 1.074 p=0.534 | 0.963 p=0.723 | 1.107 p=0.726 |
| (0.564,1.351) | (0.483,1.270) | (0.684,1.342) | (0.729,1.589) | (0.852,1.295) | (0.841,1.372) | (0.760,1.220) | (0.479,2.557) |
| 4000 Hz | **0.577 p=0.029** | **0.515 p=0.014** | 0.892 p=0.340 | 0.904 p=0.494 | 1.107 p=0.563 | 1.172 p=0.412 | 1.087 p=0.513 | 0.896 p=0.685 |
| **(0.353,0.943)** | **(0.306,0.867)** | (0.701,1.134) | (0.672,1.218) | (0.768,1.596) | (0.780,1.762) | (0.820,1.442) | (0.408,1.965) |
| 6000 Hz | 0.671 p=0.293 | 0.600 p=0.236 | 0.858 p=0.361 | 0.818 p=0.313 | 1.104 p=0.647 | 1.143 p=0.531 | 0.984 p=0.724 | 1.054 p=0.401 |
| (0.316,1.425) | (0.254,1.415) | (0.615,1.199) | (0.548,1.221) | (0.704,1.732) | (0.728,1.794) | (0.891,1.087) | (0.888,1.252) |
| 8000 Hz | 0.903 p=0.729 | 0.847 p=0.584 | 1.057 p=0.745 | 1.149 p=0.410 | 1.193 p=0.386 | 1.200 p=0.468 | 1.127 p=0.686 | 1.056 p=0.925 |
| (0.500,1.632) | (0.459,1.561) | (0.749,1.493) | (0.817,1.615) | (0.784,1.816) | (0.707,2.037) | (0.576,2.205) | (0.194,5.763) |

DPOAE: Distortion Product Otoacoustic Emissions

Hz: Hertz

Model 1: Unadjusted

Model 2: Adjusted for education and income

Age Quartiles (Age 0 = 40.21-52.64; Age 1 = 52.69-60.07; Age 2 = 60.08-68.52; Age 3 = 68.54-78.97)

Supplemental Table 4. DPOAE Amplitude and Stroke Risk (Standard Deviation): All participants

|  |  |  | Risk Level | | |  |
| --- | --- | --- | --- | --- | --- | --- |
| DP amplitude | Type | Total (n=1107) | Low Risk  (n=315) | Med Risk  (n=134) | High Risk  (n=658) | p-value |
|
| 1000 | Right Ear | -1.78 (10.46) | 1.46 (8.98) | -0.78 (9.91) | -3.48 (10.83) | <0.001 |
| Left Ear | -1.39 (10.72) | 1.86 (9.57) | -0.56 (10.83) | -3.11 (10.85) | <0.001 |
|  |  |  |  |  |  |
| 1500 | Right Ear | -2.15 (10.89) | 1.34 (9.87) | -0.98 (10.29) | -4.03 (11.04) | <0.001 |
| Left Ear | -2.22 (11.21) | 1.47 (9.48) | -0.61 (10.40) | -4.31 (11.63) | <0.001 |
|  |  |  |  |  |  |
| 2000 | Right Ear | -4.87 (11.72) | -0.58 (9.81) | -3.97 (12.18) | -7.12 (11.88) | <0.001 |
| Left Ear | -4.74 (11.92) | -0.30 (9.59) | -3.01 (12.05) | -7.21 (12.23) | <0.001 |
|  |  |  |  |  |  |
| 3000 | Right Ear | -9.15 (11.94) | -4.67 (9.98) | -7.79 (12.54) | -11.59 (12.03) | <0.001 |
| Left Ear | -9.99 (12.15) | -4.70 (10.03) | -9.18 (12.55) | -12.69 (12.15) | <0.001 |
|  |  |  |  |  |  |
| 4000 | Right Ear | -7.43 (12.32) | -1.88 (10.17) | -6.99 (11.75) | -10.21 (12.47) | <0.001 |
| Left Ear | -7.82 (12.28) | -2.29 (10.46) | -7.49 (11.94) | -10.55 (12.28) | <0.001 |
|  |  |  |  |  |  |
| 6000 | Right Ear | -6.92 (12.49) | -1.14 (10.55) | -5.36 (13.06) | -10.04 (12.20) | <0.001 |
| Left Ear | -7.07 (12.28) | -1.87 (11.17) | -6.44 (12.61) | -9.68 (11.92) | <0.001 |
|  |  |  |  |  |  |
| 8000 | Right Ear | -10.11 (11.61) | -4.85 (11.71) | -9.60 (10.95) | -12.62 (10.85) | <0.001 |
| Left Ear | -9.85 (11.63) | -5.27 (11.46) | -9.19 (12.52) | -11.99 (10.92) | <0.001 |
|  |  |  |  |  |  |
|  |  |  |  |  |  |

Supplemental Table 5. DPOAE Amplitude and Stroke Risk (Standard Deviation): Normal Hearing (PTA4 ≤ 25 dBHL)

|  |  |  | Risk Level | | |  |
| --- | --- | --- | --- | --- | --- | --- |
| DP amplitude | Type | Total (n=810) | Low Risk  (n=292) | Med Risk  (n=104) | High Risk  (n=414) | p-value |
|
| 1000 | Right Ear | 1.22 (8.52) | 2.61 (7.88) | 1.46 (8.41) | 0.23 (8.83) | 0.002 |
| Left Ear | 1.64 (8.38) | 3.04 (8.27) | 2.80 (7.17) | 0.37 (8.56) | <0.001 |
|  |  |  |  |  |  |
| 1500 | Right Ear | 1.42 (8.31) | 2.59 (8.66) | 2.19 (7.40) | 0.42 (8.17) | 0.002 |
| Left Ear | 1.55 (8.01) | 2.81 (7.91) | 2.86 (6.50) | 0.35 (8.24) | <0.001 |
|  |  |  |  |  |  |
| 2000 | Right Ear | -0.78 (8.45) | 0.73 (8.25) | -0.36 (8.31) | -1.94 (8.46) | <0.001 |
| Left Ear | -0.26 (8.13) | 1.12 (7.84) | 1.33 (7.10) | -1.62 (8.35) | <0.001 |
|  |  |  |  |  |  |
| 3000 | Right Ear | -5.46 (9.45) | -3.58 (8.74) | -4.32 (8.88) | -7.08 (9.79) | <0.001 |
| Left Ear | -5.74 (9.23) | -3.33 (8.48) | -4.82 (8.68) | -7.68 (9.45) | <0.001 |
|  |  |  |  |  |  |
| 4000 | Right Ear | -3.93 (10.22) | -0.74 (8.86) | -4.66 (10.89) | -6.01 (10.40) | <0.001 |
| Left Ear | -4.01 (9.91) | -1.07 (9.41) | -4.07 (9.35) | -6.07 (9.89) | <0.001 |
|  |  |  |  |  |  |
| 6000 | Right Ear | -3.77 (11.31) | -0.18 (9.76) | -3.36 (12.71) | -6.40 (11.28) | <0.001 |
| Left Ear | -3.85 (11.08) | -0.67 (10.11) | -4.29 (12.38) | -5.96 (10.90) | <0.001 |
|  |  |  |  |  |  |
| 8000 | Right Ear | -7.86 (11.43) | -4.25 (11.58) | -8.28 (10.95) | -10.20 (10.83) | <0.001 |
| Left Ear | -7.77 (11.71) | -4.57 (11.33) | -7.86 (12.62) | -9.84 (11.29) | <0.001 |
|  |  |  |  |  |  |

Supplemental Table 6. DPOAE Amplitude and Stroke Risk (Standard Deviation): Normal Hearing (All Freq. ≤ 25 dBHL)

|  |  |  | Risk Level | | |  |
| --- | --- | --- | --- | --- | --- | --- |
| DP amplitude | Type | Total (n=417) | Low Risk  (n=225) | Med Risk  (n=57) | High Risk  (n=189) | p-value |
|
| 1000 | Right Ear | 2.53 (7.48) | 3.05 (7.78) | 4.11 (5.01) | 1.48 (7.61) | 0.033 |
| Left Ear | 2.83 (7.54) | 3.49 (7.79) | 3.40 (6.53) | 1.89 (7.45) | 0.090 |
|  |  |  |  |  |  |
| 1500 | Right Ear | 2.78 (7.80) | 2.80 (8.71) | 3.93 (7.23) | 2.42 (6.79) | 0.463 |
| Left Ear | 2.71 (7.33) | 3.21 (7.84) | 3.46 (6.52) | 1.89 (6.86) | 0.142 |
|  |  |  |  |  |  |
| 2000 | Right Ear | 1.15 (7.52) | 1.61 (7.70) | 1.89 (7.64) | 0.40 (7.24) | 0.203 |
| Left Ear | 1.30 (7.33) | 1.80 (7.41) | 3.26 (6.16) | 0.12 (7.41) | 0.007 |
|  |  |  |  |  |  |
| 3000 | Right Ear | -3.12 (8.17) | -2.50 (8.28) | -1.44 (7.81) | -4.35 (8.01) | 0.020 |
| Left Ear | -3.01 (7.95) | -2.15 (7.83) | -0.85 (6.35) | -4.67 (8.24) | 0.001 |
|  |  |  |  |  |  |
| 4000 | Right Ear | -0.80 (8.35) | 0.70 (7.96) | -0.59 (8.88) | -2.67 (8.33) | <0.001 |
| Left Ear | -0.98 (8.60) | 0.62 (8.37) | 0.15 (7.53) | -3.23 (8.70) | <0.001 |
|  |  |  |  |  |  |
| 6000 | Right Ear | 0.71 (8.66) | 2.03 (7.94) | 2.60 (9.15) | -1.42 (8.95) | <0.001 |
| Left Ear | 0.32 (9.14) | 1.51 (8.94) | 1.78 (8.88) | -1.53 (9.19) | 0.001 |
|  |  |  |  |  |  |
| 8000 | Right Ear | -3.49 (10.48) | -1.77 (10.76) | -5.02 (9.72) | -5.10 (10.08) | 0.005 |
| Left Ear | -3.55 (10.65) | -2.55 (10.69) | -2.01 (10.47) | -5.14 (10.52) | 0.038 |
|  |  |  |  |  |  |
